# Supplementary material for: Catalysis of the hydrodechlorination of 4-chlorophenol and the reduction of 4-nitrophenol by Pd/Fe3O4@C
Source: Royal Society of Chemistry journal article supplement (doi:10.1039/c6nj04045d), 2017-01-01
Supplement: c6nj04045d1.pdf [file c6nj04045d1.pdf]

## Catalysis of the hydro-dechlorination of 4-chlorophenol and the reduction of 4-nitrophenol by Pd/Fe<sub>3</sub>O<sub>4</sub>@C

Fuchong Li<sup>a</sup>, Yansheng Liu<sup>b</sup>, Tianqiong Ma<sup>b</sup>, Dianhong Xu<sup>a</sup>, Xu Li<sup>a</sup>, Guangbi Gong<sup>a\*</sup>

a: Address here. Lanzhou Petrochemical Research Center Lanzhou 730060, P. R. China.

b: Gansu Provincial Engineering Laboratory for Chemical Catalysis, College of Chemistry and Chemical Engineering, Lanzhou University, Lanzhou 730000, P. R. China.

\* Corresponding author, E-mail addresses: gongguangbi@petrochina.com.cn

Fax: +86 0931 82665; Tel: +86 0931 82665

publication in *New Journal of Chemistry*

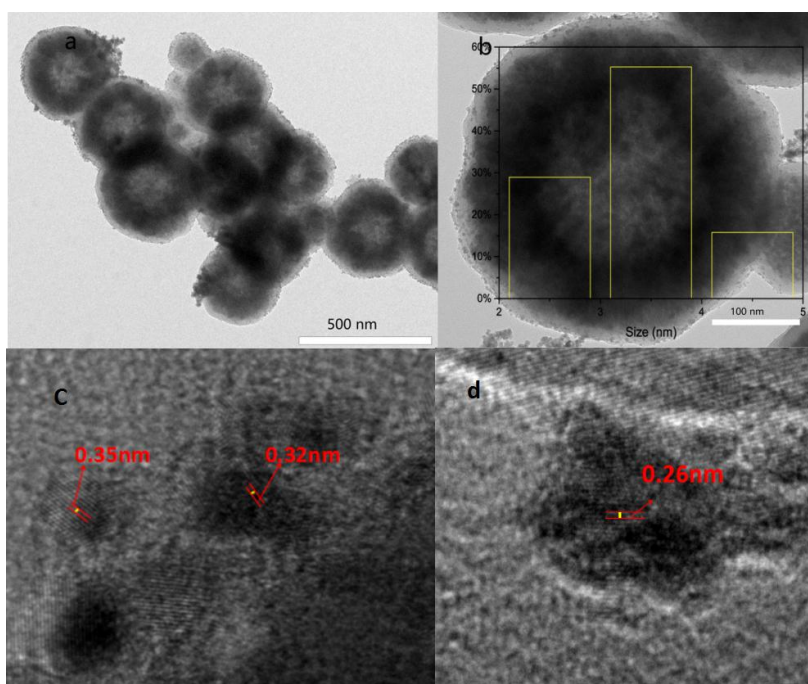

Figure S1. TEM image of Pd/Fe<sub>3</sub>O<sub>4</sub>@SiO<sub>2</sub> NPs (a) and higher magnification TEM image of Pd/Fe<sub>3</sub>O<sub>4</sub>@SiO<sub>2</sub> (b) crystal lattice of the Pd NPs of Pd/Fe<sub>3</sub>O<sub>4</sub>@C (c) crystal lattice of the Pd NPs of Pd/Fe<sub>3</sub>O<sub>4</sub>@SiO<sub>2</sub>

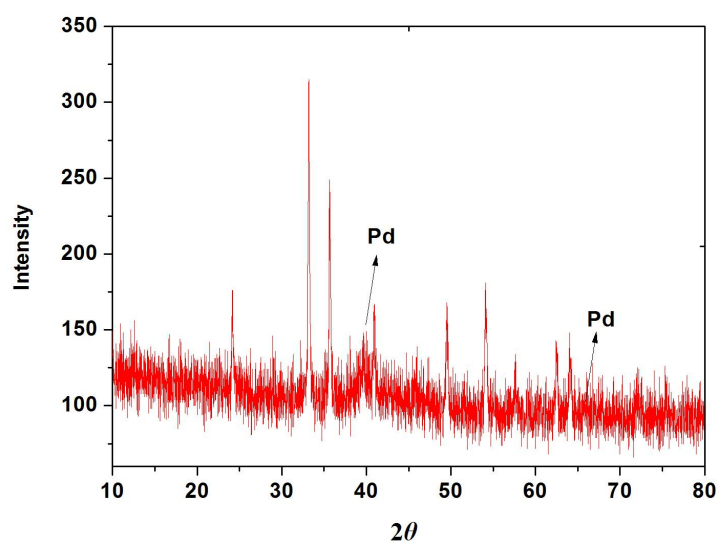

Figure S2 Wide-angle XRD patterns of **Pd/Fe<sub>3</sub>O<sub>4</sub>@C**(palladium content was reached 9.23%)
